# Supplementary material for: The SARS-CoV-2 main protease doesn’t induce cell death in human cells in vitro
Source: PubMed Central journal article supplement (PMC9129031; doi:10.1371/journal.pone.0266015), 2022-05-24
Supplement: pone.0266015.s001.pdf [file pone.0266015.s001.pdf]

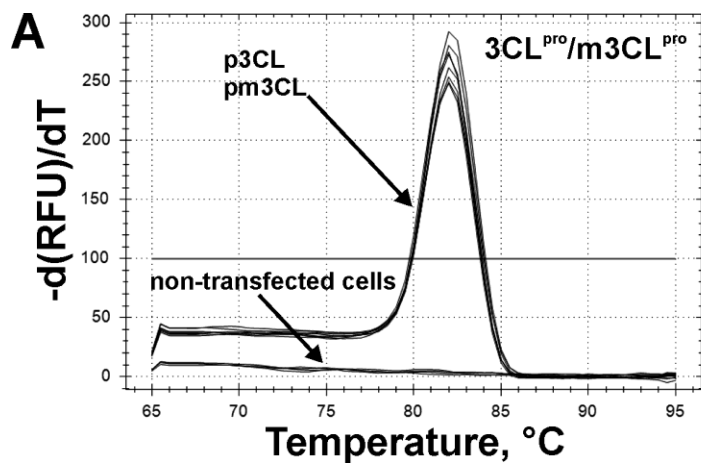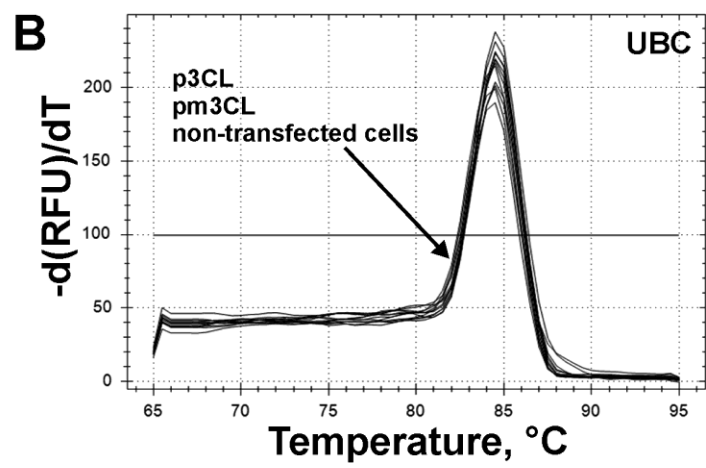

**S1 Fig. Specificity of primer/probe sets used for PCR analysis of the expression of 3CLpro/m3CLpro (A) and UBC (B).** HEK293, HeLa, A549 and Calu1 cells were transfected with p3CL and pm3CL plasmids, and total RNA was isolated 24 h post transfection. The expression of 3CLpro, m3CLpro and ubiquitin C (UBC) genes was detected using quantitative real-time PCR with reverse transcription, and specificity of primer/probe sets was confirmed using corresponding melting curves.
