# Supplementary material for: The SARS-CoV-2 main protease doesn’t induce cell death in human cells in vitro
Source: PubMed Central journal article supplement (PMC9129031; doi:10.1371/journal.pone.0266015), 2022-05-24
Supplement: pone.0266015.s002.pdf [file pone.0266015.s002.pdf]

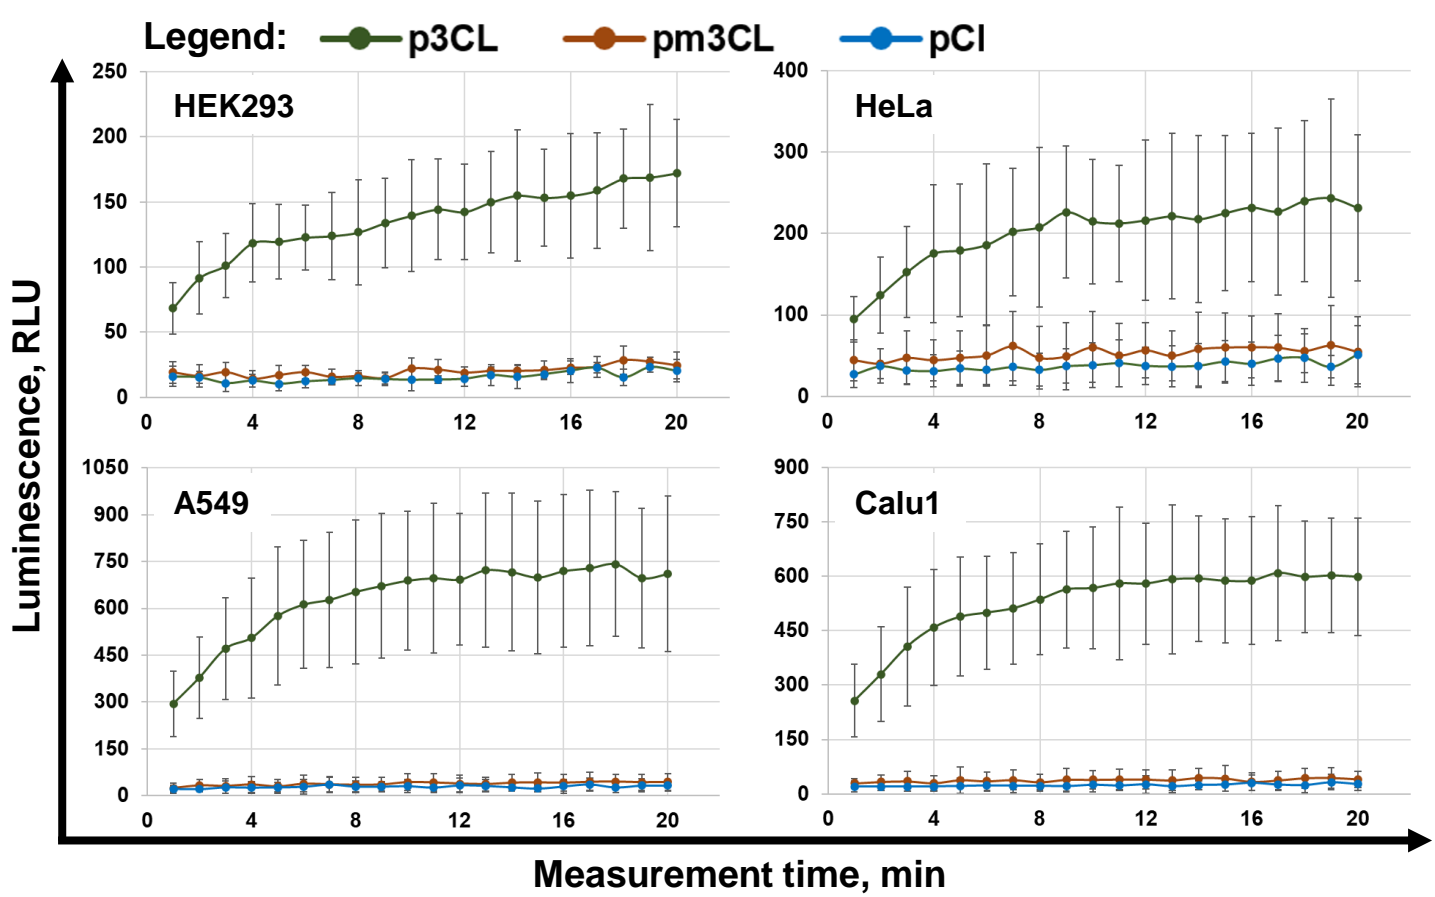

Measurement time, min

**S2 Fig. 3CL<sup>pro</sup> proteolytic activity analysis.** Cells were co-transfected with p3CL, pm3CL, or pCI constructs and pGlo-3CL providing the expression of 3CL<sup>pro</sup>-specific biosensor; 24 h post transfection luciferase activity in transfected cultures was analyzed using GloSensor reagent. Values are represented as mean  $\pm$  SD of two independent experiments with triplicates (n = 6).
