# Supplementary material for: The SARS-CoV-2 main protease doesn’t induce cell death in human cells in vitro
Source: PubMed Central journal article supplement (PMC9129031; doi:10.1371/journal.pone.0266015), 2022-05-24
Supplement: pone.0266015.s003.pdf [file pone.0266015.s003.pdf]

**S1 Table. Characteristics of the cell cultures co-transfected with pCI-EGFP and p3CL/pm3CL plasmids.**

| % of EGFP-positive cells |             |             |             |             |
|--------------------------|-------------|-------------|-------------|-------------|
| Cell line                | 24 h p.t.   |             | 48 h p.t.   |             |
|                          | 3CL         | m3CL        | 3CL         | m3CL        |
| HEK293                   | 34.2 ± 22.3 | 31.7 ± 13.5 | 61.4 ± 14.3 | 58.1 ± 8.6  |
| HeLa                     | 13.7 ± 2.5  | 15.3 ± 3.4  | 37.9 ± 21.4 | 39.6 ± 9.1  |
| A549                     | 14.5 ± 5.6  | 15.2 ± 6.8  | 16.8 ± 7.6  | 20.6 ± 13.5 |
| Calu1                    | 13.3 ± 7.5  | 10.8 ± 2.9  | 16.9 ± 4.2  | 23.1 ± 11.1 |

  

| Mean fluorescence of EGFP-positive cells, RFU |                     |                   |                     |                     |
|-----------------------------------------------|---------------------|-------------------|---------------------|---------------------|
| Cell line                                     | 24 h p.t.           |                   | 48 h p.t.           |                     |
|                                               | 3CL                 | m3CL              | 3CL                 | m3CL                |
| HEK293                                        | 869 468 ± 513 692   | 876 392 ± 485 357 | 1 193 423 ± 328 292 | 1 057 723 ± 164 701 |
| HeLa                                          | 1 067 964 ± 238 344 | 976 792 ± 221 189 | 1 326 672 ± 247 548 | 1 303 416 ± 404 400 |
| A549                                          | 898 868 ± 67 090    | 895 375 ± 162 922 | 786 842 ± 307 964   | 652 890 ± 330 495   |
| Calu1                                         | 850 300 ± 159 658   | 792 967 ± 149 797 | 801 678 ± 498 137   | 758 177 ± 466 184   |

Values are represented as mean ± SD of two independent experiments with triplicates. No statistically significant differences between the cells expressing 3CL and m3CL were observed (nonparametric two-tailed Mann-Whitney U test, n =6). h p.t. – hours post transfection.
